# Supplementary material for: Metabolic Dynamics and Prediction of Gestational Age and Time to Delivery in Pregnant Women
Source: PubMed Central journal article supplement (PMC7327522; doi:10.1016/j.cell.2020.05.002), 2020-06-25
Supplement: mmc1.pdf [file mmc1.pdf]

**Cell, Volume 181**

## **Supplemental Information**

### **Metabolic Dynamics and Prediction of Gestational**

### **Age and Time to Delivery in Pregnant Women**

**Liang Liang, Marie-Louise Hee Rasmussen, Brian Piening, Xiaotao Shen, Songjie Chen, Hannes Röst, John K. Snyder, Robert Tibshirani, Line Skotte, Norman CY. Lee, Kévin Contrepois, Bjarke Feenstra, Hanyah Zackriah, Michael Snyder, and Mads Melbye**

## Supplemental Tables

**Table S1. Information of the list of the top identified metabolites significantly associated with pregnancy progression (FDR < 0.05). Related to Figure 2**

| Metabolites                                | HMDB ID   | Pathways                     | Weekly log <sub>2</sub> (intensity) Changes |
|--------------------------------------------|-----------|------------------------------|---------------------------------------------|
| Estriol-16-Glucuronide                     | HMDB06766 | Steroid hormone biosynthesis | 0.1674                                      |
| Estrone 3-sulfate                          | HMDB01425 | Steroid hormone biosynthesis | 0.0879                                      |
| Tetrahydrodeoxycorticosterone (THDOC)      | HMDB00879 | Steroid hormone biosynthesis | 0.0755                                      |
| N-Acetyl-D-glucosamine                     | HMDB00215 | Others                       | 0.0619                                      |
| Progesterone                               | HMDB01830 | Steroid hormone biosynthesis | 0.0617                                      |
| 17 $\alpha$ -Hydroxyprogesterone           | HMDB00374 | Steroid hormone biosynthesis | 0.0586                                      |
| Caffeine                                   | HMDB01847 | Caffeine metabolism          | 0.0459                                      |
| 3-Acetoxy pyridine                         | HMDB33131 | Others                       | 0.0446                                      |
| 5-Pregnane-3,17-diol-20-one 3-sulfate      | METPA0001 | Steroid hormone biosynthesis | 0.0415                                      |
| 7 $\alpha$ ,24-Dihydroxy-4-cholesten-3-one | HMDB12457 | Bile acid biosynthesis       | 0.0404                                      |
| Theophylline                               | HMDB01889 | Caffeine metabolism          | 0.0378                                      |
| 1-Methylxanthine                           | HMDB10738 | Caffeine metabolism          | 0.0357                                      |
| C16 PAF (Platelet-activating factor)       | HMDB39527 | Fatty acid metabolism        | 0.0326                                      |
| Cortisone                                  | HMDB02802 | Steroid hormone biosynthesis | 0.0314                                      |
| Docosadienoic acid                         | HMDB61714 | Fatty acid metabolism        | 0.0312                                      |
| Tetracosapentaenoic acid                   | HMDB06322 | Fatty acid metabolism        | 0.0298                                      |
| Pregnenolone sulfate                       | HMDB00774 | Steroid hormone biosynthesis | 0.0264                                      |
| Theobromine                                | HMDB02825 | Caffeine metabolism          | 0.0261                                      |
| Cortisol                                   | HMDB00063 | Steroid hormone biosynthesis | 0.0260                                      |
| 17,18-EpETE                                | HMDB10212 | Fatty acid metabolism        | 0.0253                                      |
| Corticosterone                             | HMDB01547 | Steroid hormone biosynthesis | 0.0239                                      |
| Androstane-3,17-diol                       | HMDB00495 | Steroid hormone biosynthesis | 0.0237                                      |
| Taurochenodeoxycholate                     | HMDB00951 | Bile acid biosynthesis       | 0.0234                                      |
| Erucic acid                                | HMDB02068 | Fatty acid metabolism        | 0.0220                                      |
| Sphingosine                                | HMDB00252 | Others                       | 0.0205                                      |
| Dodecanoylcarnitine                        | HMDB02250 | Fatty acid metabolism        | 0.0197                                      |

|                                         |           |                              |         |
|-----------------------------------------|-----------|------------------------------|---------|
| Tetracosatetraenoic acid                | HMDB06246 | Fatty acid metabolism        | 0.0190  |
| Tetracosahexaenoic acid                 | HMDB02007 | Fatty acid metabolism        | 0.0186  |
| 7-Methylguanine                         | HMDB00897 | Others                       | 0.0179  |
| Cyclo(leucylprolyl)                     | HMDB34276 | Caffeine metabolism          | 0.0169  |
| PC(18:1(9Z)e/2:0)                       | HMDB11148 | Phospholipid metabolism      | -0.0151 |
| LPE(20:3)                               | HMDB11484 | Phospholipid metabolism      | -0.0156 |
| Ketoisovaleric acid                     | HMDB00019 | Amino acid metabolism        | -0.0160 |
| Valylhistidine                          | METPA0001 | Amino acid metabolism        | -0.0161 |
| Tricosanoic acid                        | HMDB01160 | Fatty acid metabolism        | -0.0165 |
| Androsterone sulfate                    | HMDB02759 | Steroid hormone biosynthesis | -0.0166 |
| MG(18:1)                                | HMDB11536 | Fatty acid metabolism        | -0.0169 |
| PC(22:1/22:1) (Lecithin)                | HMDB14291 | Phospholipid metabolism      | -0.0170 |
| 3-Hydroxyoleylcarnitine                 | HMDB13132 | Fatty acid metabolism        | -0.0170 |
| Hexadecadienoylcarnitine                | HMDB13334 | Fatty acid metabolism        | -0.0170 |
| Sinapyl alcohol                         | HMDB13070 | Others                       | -0.0186 |
| Hydroxybupropion                        | HMDB12235 | Others                       | -0.0188 |
| 2-Phenylbutyric acid                    | HMDB00329 | Others                       | -0.0191 |
| Glycochenodeoxycholate                  | HMDB00637 | Bile acid biosynthesis       | -0.0192 |
| LPC(18:2)                               | HMDB10386 | Phospholipid metabolism      | -0.0194 |
| LPE(22:4)                               | HMDB11493 | Phospholipid metabolism      | -0.0196 |
| LPC(24:0)                               | HMDB10405 | Phospholipid metabolism      | -0.0203 |
| LPE(20:1)                               | HMDB11482 | Phospholipid metabolism      | -0.0208 |
| Isobutyryl-L-carnitine                  | HMDB00736 | Fatty acid metabolism        | -0.0213 |
| LPE(22:1)                               | HMDB11491 | Phospholipid metabolism      | -0.0213 |
| Glycyrrhetic acid                       | HMDB11628 | Fatty acid metabolism        | -0.0218 |
| LPE(20:0)                               | HMDB11481 | Phospholipid metabolism      | -0.0222 |
| 8,9-DHET                                | HMDB02311 | Fatty acid metabolism        | -0.0240 |
| LPC(P-18:0)                             | HMDB13122 | Phospholipid metabolism      | -0.0244 |
| LPC(20:5)                               | HMDB10397 | Phospholipid metabolism      | -0.0248 |
| MG(14:1)                                | HMDB11531 | Fatty acid metabolism        | -0.0273 |
| LPC(P-18:1)                             | HMDB10408 | Phospholipid metabolism      | -0.0280 |
| PE(P-16:0e/0:0)                         | HMDB11152 | Phospholipid metabolism      | -0.0285 |
| Dehydroepiandrosterone sulfate (DHEA-S) | HMDB01032 | Steroid hormone biosynthesis | -0.0294 |
| Oleoylcarnitine                         | HMDB05065 | Fatty acid metabolism        | -0.0312 |
| beta-Glycyrrhetic acid                  | HMDB34517 | Fatty acid metabolism        | -0.0319 |
| LPC(17:0)                               | HMDB12108 | Phospholipid metabolism      | -0.0328 |
| LPC(P-16:0)                             | HMDB10407 | Phospholipid metabolism      | -0.0332 |
| MG(24:1)                                | HMDB11559 | Fatty acid metabolism        | -0.0334 |

|           |           |                         |         |
|-----------|-----------|-------------------------|---------|
| MG(24:0)  | HMDB11558 | Fatty acid metabolism   | -0.0346 |
| LPE(22:2) | HMDB11492 | Phospholipid metabolism | -0.0440 |
| MG(22:2)  | HMDB11553 | Fatty acid metabolism   | -0.0466 |
| MG(20:0)  | HMDB11542 | Fatty acid metabolism   | -0.0483 |

**Table S2. Summary of the metabolic features selected by machine learning in the gestational age prediction model. Related to Figure 4**

Fragments formulae are given for exact mass of ions detected.

| Metabolic feature | Contribution | m/z      | RT/min | Polarity | Compound/Ion Formula    | MSI Confidence Level <sup>23</sup> |
|-------------------|--------------|----------|--------|----------|-------------------------|------------------------------------|
| M1                | 0.15640      | 399.1482 | 6.70   | negative | C19H28O7S               | 3                                  |
| M2                | 0.10627      | 438.2974 | 9.52   | positive | PE(P-16:0e/0:0)         | 1                                  |
| M3                | 0.07564      | 413.3057 | 10.94  | negative | C27H42O3                | 3                                  |
| M4*               | 0.06705      | 529.2412 | 8.02   | positive | C29H38O9Na              | 3                                  |
| M5                | 0.05015      | 510.9290 | 5.38   | positive |                         |                                    |
| M6                | 0.04615      | 417.3354 | 10.48  | positive | C27H44O3                | 3                                  |
| M7                | 0.04528      | 531.2562 | 7.73   | positive | C27H40O9Na              | 4                                  |
| M8                | 0.04311      | 511.2904 | 7.82   | negative | C27H44O9                | 3                                  |
| M9                | 0.03431      | 399.1481 | 5.71   | negative | C19H28O7S               | 3                                  |
| M10 <sup>#</sup>  | 0.03074      | 257.2261 | 8.33   | positive | C19H29                  | 3                                  |
| M11               | 0.02803      | 315.2314 | 7.58   | positive | C21H30O2                | 3                                  |
| M12               | 0.02468      | 519.2564 | 8.64   | positive |                         |                                    |
| M13               | 0.02443      | 563.1797 | 6.59   | positive |                         |                                    |
| M14               | 0.02437      | 463.1968 | 6.66   | negative | Estriol-16-Glucuronide  | 1                                  |
| M15*              | 0.02206      | 353.2085 | 7.91   | positive | C21H30O3Na              | 3                                  |
| M16*              | 0.01911      | 487.1935 | 6.61   | positive | C24H32O9Na              | 3                                  |
| M17               | 0.01820      | 483.2593 | 8.33   | negative | C25H40O9                | 4                                  |
| M18               | 0.01673      | 431.3153 | 9.78   | negative | C27H44O4                | 4                                  |
| M19               | 0.01412      | 415.3192 | 9.47   | positive | C27H42O3                | 3                                  |
| M20 <sup>#</sup>  | 0.01353      | 301.2522 | 7.74   | positive | C21H33O                 | 3                                  |
| M21 <sup>#</sup>  | 0.01333      | 331.2265 | 7.92   | positive | C21H31O3                | 3                                  |
| M22               | 0.01276      | 538.3501 | 8.88   | positive | C26H52NO8P              | 4                                  |
| M23               | 0.01265      | 493.2799 | 9.13   | negative | C27H42O8                | 4                                  |
| M24               | 0.01202      | 263.1388 | 1.89   | positive | Prolylphenylalanine     | 2                                  |
| M25               | 0.01188      | 371.1884 | 9.70   | negative | C19H31O5S               | 3                                  |
| M26               | 0.00971      | 465.3449 | 7.39   | positive | C23H49N2O5P or C30H50O8 | 4                                  |
| M27 <sup>#</sup>  | 0.00928      | 297.2210 | 7.42   | positive | C21H29O                 | 4                                  |
| M28               | 0.00920      | 593.3692 | 10.17  | negative | C33H54O9                | 3                                  |
| M29               | 0.00900      | 347.2591 | 9.52   | negative | C22H36O3                | 4                                  |
| M30               | 0.00768      | 498.3037 | 9.26   | negative |                         | 4                                  |
| M31 <sup>#</sup>  | 0.00616      | 319.1648 | 2.58   | positive | C21H31O3                | 4                                  |
| M32               | 0.00601      | 401.1638 | 7.89   | negative | C19H30O7S               | 3                                  |

|                  |         |          |      |          |                                            |   |
|------------------|---------|----------|------|----------|--------------------------------------------|---|
| M33              | 0.00584 | 525.2694 | 6.33 | negative | C27H42O10                                  | 3 |
| M34              | 0.00506 | 381.1011 | 5.39 | negative | C18H22O7S, likely<br>6-Ketoestriol sulfate | 3 |
| M35              | 0.00356 | 315.2315 | 9.30 | positive | Progesterone                               | 1 |
| M36              | 0.00175 | 821.2961 | 9.13 | negative |                                            |   |
| M37              | 0.00125 | 527.2852 | 8.26 | negative | C27H44O10                                  | 3 |
| M38              | 0.00089 | 653.2862 | 9.26 | negative |                                            |   |
| M39              | 0.00082 | 798.3566 | 8.45 | positive |                                            |   |
| M40              | 0.00032 | 260.1064 | 9.78 | negative |                                            |   |
| M41              | 0.00027 | 823.3115 | 9.26 | negative |                                            |   |
| M42 <sup>§</sup> | 0.00020 | 337.2135 | 9.30 | positive | C21H30O2Na                                 | 3 |

\* Features are sodium ionized.

# Features are fragments.

§ The feature is sodium ionized progesterone.

**Table S4. Information of the seven predictors in the machine-learning models. Related to Figure 4 and Figure 5**

| Polarity | m/z      | RT (second ) | Compound Name                                               | Formula                                           | Adduct                               | m/z Error (ppm) | RT Error (s) | MS/MS Similarity Score (Dot Product) |
|----------|----------|--------------|-------------------------------------------------------------|---------------------------------------------------|--------------------------------------|-----------------|--------------|--------------------------------------|
| Positive | 299.2365 | 526.8        | THDOC (3 $\alpha$ ,21-Dihydroxy-5 $\alpha$ -pregnan-20-one) | C <sub>21</sub> H <sub>34</sub> O <sub>3</sub>    | [M+H-2H <sub>2</sub> O] <sup>-</sup> | 3.31            | 15.6         | 0.75                                 |
| Negative | 463.1968 | 413.5        | Estriol-16-Glucuronide                                      | C <sub>24</sub> H <sub>32</sub> O <sub>9</sub>    | [M-H] <sup>-</sup>                   | 0.02            | 1.2          | 0.88                                 |
| Positive | 315.2315 | 574.9        | Progesterone                                                | C <sub>21</sub> H <sub>30</sub> O <sub>2</sub>    | [M+H] <sup>+</sup>                   | 2.87            | 1.2          | 0.99                                 |
| Positive | 438.2974 | 555.5        | PE(P-16:0e/0:0)                                             | C <sub>21</sub> H <sub>44</sub> NO <sub>6</sub> P | [M+H] <sup>+</sup>                   | 2.40            | 0.6          | 0.99                                 |
| Negative | 367.1583 | 572.3        | Dehydroepiandrosterone sulfate (DHEA-S)                     | C <sub>19</sub> H <sub>28</sub> O <sub>5</sub> S  | [M-H] <sup>-</sup>                   | 1.04            | 9.0          | 0.83                                 |
| Positive | 257.2260 | 548.0        | Androstane-3,17-diol                                        | C <sub>19</sub> H <sub>32</sub> O <sub>2</sub>    | [M+H-2H <sub>2</sub> O] <sup>-</sup> | 3.60            | 2.4          | 0.87                                 |
| Positive | 331.2262 | 496.7        | 17 $\alpha$ -Hydroxyprogesterone                            | C <sub>21</sub> H <sub>30</sub> O <sub>3</sub>    | [M+H] <sup>+</sup>                   | 3.38            | 29.4         | 0.98                                 |
